# Supplementary material
Source: HighWire-hosted journal article supplement (https://learnmem.cshlp.org/content/suppl/2024/04/15/31.4.a053902)
Supplement: Supplemental_Material.docx [file Supplemental_Material.docx]

**Supporting information**

**Figure S1.** A) Study design: A fully combined two-factorial between-subject design. The two experimental factors were the time of extinction training (immediate vs. delayed [+24 h]) and the time of the retention test (1 d vs. 7 d). B) Trial structure. Each trial lasted 8 s. During the last 4 s of the CS presentation, participants had to rate their fear of a UCS during that trial. ITIs were 9.5-12s. The UCS was given with a reinforcement rate of 62.5% at CS+ offset. The assignment of stimuli was counterbalanced. Trials were presented in a pseudo-random order. Each experimental phase consisted of 32 trials (16 per CS). © Kampa et al. 2023. Published by Oxford University Press. All rights reserved. For permissions, please e-mail: journals.permissions@oup.com

**Table S1**. Main effects, CS x trial interactions and extinction group x test group interactions tested in rmANOVAs on online fear ratings and SCR.

Note. ****p*<0.001, ***p*<0.01, **p*<0.05. 1Fear acquisition and extinction training consisted of 16 trials. 2Extinction group: immediate vs. delayed extinction. 3 Return of fear was tested by comparing the last trial of extinction with the first trial of the test. 4Test group : +1day vs. +7days after extinction. In case of violations to sphericity, Greenhouse Geisser correction was applied (see adapted df and dferror). © Kampa et al. 2023. Published by Oxford University Press. All rights reserved. For permissions, please e-mail: [journals.permissions@oup.com](mailto:journals.permissions@oup.com)

**Table S2**. Demographic and psychological characteristics of the two subsamples with (n=57) and without (n=47) cortisol assessment

|  |  | **With cortisol** | | **Without cortisol** | | |  |  | |
| --- | --- | --- | --- | --- | --- | --- | --- | --- | --- |
| Measure |  | *M/ freq.* | *SD* | *M/ freq.* | | *SD* | *t-score/ Chi2* | | *p (pBC)* |
| sex (female) | | 29 |  | 27 | |  | 0.627 | | 0.428 |
| age | | 23.109 | 3.027 | 23.175 | | 3.224 | -0.107 | | 0.915 |
| mental health (GHQ-28)1 | | 50.591 | 11.558 | 48.250 | | 10.206 | 1.074 | | 0.285 |
| trait anxiety(STAI-T)2 | | 40.744 | 9.986 | 41.123 | | 9.588 | -0.192 | | 0.848 |
| stress resilience(BRS)3 | | 3.651 | 0.784 | 3.640 | | 0.688 | 0.073 | | 0.942 |
| childhood trauma (CTQ)4 | |  |  |  | |  |  | |  |
| emotional abuse | | 8.929 | 4.826 | 8.278 | | 3.423 | 0.773 | | 0.442 |
| emotional neglect | | 10.167 | 4.606 | 9.222 | | 3.648 | 1.121 | | 0.265 |
| physical abuse | | 6.286 | 2.796 | 5.685 | | 1.527 | 1.343 | | 0.183 |
| physical neglect | | 6.571 | 2.510 | 5.963 | | 1.801 | 1.382 | | 0.170 |
| sexual abuse | | 5.095 | 0.370 | 5.444 | | 1.254 | -1.745 | | 0.084 |
| Big Five (NEO-FFI)5 | |  |  |  | |  |  | |  |
| neuroticism | | 21.140 | 9.242 | 21.268 | | 7.773 | -0.075 | | 0.940 |
| extraversion | | 28.116 | 5.142 | 27.750 | | 5.596 | 0.334 | | 0.739 |
| openness | | 33.302 | 6.186 | 30.696 | | 5.673 | 2.178 | | 0.032 (0.576) |
| agreeableness | | 31.605 | 8.511 | 31.411 | | 5.886 | 0.134 | | 0.894 |
| consciousness | | 31.977 | 5.492 | 32.232 | | 6.983 | -0.197 | | 0.844 |
| coping (ABI-T)6 | |  |  | |  |  |  | |  |
| cognitive avoidance, physical threat | | 7.279 | 2.622 | | 7.754 | 3.269 | -0.782 | | 0.436 |
| cognitive avoidance, threat to self-esteem | | 7.953 | 3.585 | | 9.421 | 3.625 | -2.014 | | 0.047 (0.846) |
| vigilance, physical threat | | 10.535 | 3.942 | | 9.298 | 4.053 | 1.528 | | 0.130 |
| vigilance, threat to self-esteem | | 6.977 | 3.776 | | 6.000 | 3.443 | 1.347 | | 0.181 |
| life events (LESS)7 | | 7.341 | 3.864 | | 7.268 | 3.119 | 0.105 | | 0.917 |

Note. 1General Health Questionnaire-28, German: Klaiberg et al. (2004), original: Goldberg & Hillier (1979), n=44 vs. 56; 2State Trait Anxiety Index-trait, German: Laux et al. (1981) original: Spielberger et al. (1970), n=43 vs. 57; 3Brief Resilience Scale, German: Chmitorz et al. (2018), original: Smith et al. (2008), n=43 vs. 57; 4Childhood Trauma Questionnaire, German: Wingenfeld et al. (2010), original: Bernstein et al. (2011), n=42 vs. 54; 5Neuroticism-Extraversion-Openness: Five-Factor Inventory, German: Borkenau & Ostendorf (1993), original: Costa & McCrae, 1989, n=43 vs. 56; 6Angst-Bewältigungs-Inventar, original: Krohne & Egloff, 1999, n=43 vs. 57; 7Life Events Scale for Students, original: Clements & Turpin, 1996, translated to German, n=44 vs. 56; two items (19, 23) were missing compared to the original list of events. *p<0.05. In case of a significant group difference, we included a Bonferroni-corrected p-value by multiplying it by the number of 18 tests.

**Table S3.** Regression model results for control analyses including CS type in first test trial as covariate

|  |  | n | *R2* | *F* | *df* | p |
| --- | --- | --- | --- | --- | --- | --- |
| **immediate extinction** | |  |  |  |  |  |
| *subjective arousal* | |  |  |  |  |  |
|  | early test | 27 | 0.058 | 0.732 | 2, 24 | 0.491 |
|  | late test | 25 | 0.007 | 0.073 | 2, 22 | 0.930 |
|  | all subjects | 52 | 0.022 | 0.541 | 2, 49 | 0.585 |
| *tonic SC* |  |  |  |  |  |  |
|  | early test | 24 | 0.249 | 3.483* | 2, 21 | 0.049 |
|  | late test | 20 | 0.203 | 2.170 | 2, 17 | 0.145 |
|  | all subjects | 44 | 0.200 | 5.123* | 2, 41 | 0.010 |
| *salivary cortisol* | | 24 | 0.380 | 6.441* | 2, 21 | 0.007 |
| **delayed extinction** | |  |  |  |  |  |
| *subjective arousal* | |  |  |  |  |  |
|  | early test | 24 | 0.093 | 1.074 | 2, 21 | 0.360 |
|  | late test | 25 | 0.009 | 0.097 | 2, 22 | 0.908 |
|  | all subjects | 49 | 0.058 | 1.426 | 2, 46 | 0.251 |
| *tonic SC* |  |  |  |  |  |  |
|  | early test | 20 | 0.292 | 3.512 | 2, 17 | 0.053 |
|  | late test | 18 | 0.301 | 3.225 | 2, 15 | 0.068 |
|  | all subjects | 38 | 0.290 | 7.144* | 2, 35 | 0.003 |
| *salivary cortisol* | | 23 | 0.125 | 1.424 | 2, 20 | 0.264 |

Note. SC, skin conductance; **p*<0.05

**Table S4.** Regression coefficients for control analyses including pre-extinction arousal (*b1, β1*) as predictor and CS type in first test trial as covariate (*b2, β2*)

|  |  | *b0* | *SE* | *t* | *p* | *b1* | *SE* | *β1* | *t* | *p* | *b2* | *SE* | *β2* | *t* | *p* |
| --- | --- | --- | --- | --- | --- | --- | --- | --- | --- | --- | --- | --- | --- | --- | --- |
| **immediate extinction** | |  |  |  |  |  |  |  |  |  |  |  |  |  |  |
| *subjective arousal* | |  |  |  |  |  |  |  |  |  |  |  |  |  |  |
|  | early test | 6.596 | 12.276 | 0.537 | 0.596 | 1.101 | 2.268 | 0.098 | 0.486 | 0.632 | 10.240 | 10.139 | 0.203 | 1.010 | 0.323 |
|  | late test | 18.588 | 20.083 | 0.926 | 0.365 | -0.149 | 3.745 | -0.009 | -0.040 | 0.969 | 5.540 | 14.537 | 0.081 | 0.381 | 0.707 |
|  | all subjects | 11.888 | 9.620 | 1.236 | 0.223 | 2.773 | 2.340 | 0.170 | 1.185 | 0.242 | -9.929 | 9.038 | -0.158 | -1.099 | 0.278 |
| *tonic SC* | |  |  |  |  |  |  |  |  |  |  |  |  |  |  |
|  | early test | -0.133 | 0.207 | -0.641 | 0.529 | -0.006 | 0.020 | -0.060 | -0.311 | 0.759 | 0.526* | 0.210 | 0.484* | 2.507 | 0.020 |
|  | late test | -0.177 | 0.141 | -1.262 | 0.224 | 0.019 | 0.017 | 0.242 | 1.107 | 0.284 | 0.277 | 0.145 | 0.419 | 1.914 | 0.073 |
|  | all subjects | -0.139 | 0.127 | -1.095 | 0.280 | 0.002 | 0.014 | 0.024 | 0.169 | 0.867 | 0.414* | 0.130 | 0.451* | 3.177 | 0.003 |
| *salivary cortisol* | | 0.146 | 0.202 | 0.725 | 0.476 | -0.092* | 0.043 | -0.367* | -2.135 | 0.045 | 0.525* | 0.187 | 0.482* | 2.807 | 0.011 |
| **delayed extinction** | |  |  |  |  |  |  |  |  |  |  |  |  |  |  |
| *subjective arousal* | |  |  |  |  |  |  |  |  |  |  |  |  |  |  |
|  | early test | 18.806 | 16.236 | 1.158 | 0.260 | 4.032 | 3.849 | 0.221 | 1.048 | 0.307 | -12.957 | 15.437 | -0.177 | -0.839 | 0.411 |
|  | late test | 4.445 | 9.891 | 0.449 | 0.658 | 0.867 | 2.486 | 0.074 | 0.349 | 0.731 | -2.522 | 9.328 | -0.057 | -0.270 | 0.789 |
|  | all subjects | 11.789 | 10.929 | 1.079 | 0.286 | 0.613 | 2.028 | 0.043 | 0.302 | 0.764 | 8.025 | 8.513 | 0.135 | 0.943 | 0.350 |
| *tonic SC* | |  |  |  |  |  |  |  |  |  |  |  |  |  |  |
|  | early test | -0.241* | 0.113 | -2.131 | 0.048 | 0.026 | 0.017 | 0.321 | 1.510 | 0.149 | 0.233 | 0.140 | 0.353 | 1.656 | 0.116 |
|  | late test | -0.234 | 0.120 | -1.951 | 0.070 | 0.037 | 0.020 | 0.396 | 1.831 | 0.087 | 0.196 | 0.114 | 0.370 | 1.712 | 0.107 |
|  | all subjects | -0.231* | 0.078 | -2.959 | 0.005 | 0.029* | 0.012 | 0.344* | 2.377 | 0.023 | 0.216* | 0.087 | 0.360* | 2.493 | 0.018 |
| *salivary cortisol* | | -0.283 | 0.216 | -1.306 | 0.206 | 0.050 | 0.053 | 0.199 | 0.944 | 0.356 | 0.195 | 0.129 | 0.320 | 1.515 | 0.146 |

Note. SC, skin conductance; SE, standard error; **p*<0.05.

**Reference**

Kampa M, Hermann A, Stark R, Klucken T. 2023. Neural correlates of immediate versus delayed extinction when simultaneously varying the time of the test in humans. *Cereb Cortex*: bhad205.
